# Supplementary material
Source: PubMed Central journal article supplement (PMC6395315)
Supplement: 2018_203521-Disclosures_and_Contributions.pdf [file 2018_203521-Disclosures_and_Contributions.pdf]

Haematologica  
HAEMATOL/2018/203521  
Version 5

Molecular analysis of a CD19 negative diffuse large B cell lymphoma

Lorric Delage, Delphine Manzoni, Charles Quinquenet, Juliette Fontaine, Alizée Maarek, Kaddour Chabane, Isabelle Mosnier, Sandrine Hayette, Evelyne Callet-Bauchu, Beatrice Grange, Adriana Plesa, and Pierre Sujobert

Disclosures: none

Contributions: LD, DM, JF, KC, IM, SH, ECB, BG, AP, and PS were in charge of the diagnostic procedure of the patient, performed the experiments and analyzed the data. CQ was in charge of the patients. PS wrote the paper. All the authors reviewed the manuscript.
